# Supplementary material for: Rule-based omics mining reveals antimicrobial macrocyclic peptides against drug-resistant clinical isolates
Source: PubMed Central journal article supplement (PMC11162475; doi:10.1038/s41467-024-49215-y), 2024-06-08
Supplement: 41467_2024_49215_MOESM3_ESM.pdf [file 41467_2024_49215_MOESM3_ESM.pdf]

## **Description of Additional Supplementary data Files**

### **Supplementary Data 1:**

The full list of genome information, flavoprotein sequences, putative precursor sequences, accession id of flavoproteins, strain names and strain kingdoms.

### **Supplementary Data 2:**

Sequence logos of 67 precursor clusters shown in the SSN. The file name format denotes *cluster number\_number of sequences\_phyla\_representative sequence*.

### **Supplementary Data 3:**

Phylogenetic analysis of 32 ACP BGC families.

### **Supplementary Data 4:**

The mass calculation table of *mat* BGC.

### **Supplementary Data 5:**

Tandem mass calculation table of *mat* BGC.

### **Supplementary Data 6:**

The mass calculation table of *sis* BGC (including tandem mass).

### **Supplementary Data 7:**

The mass calculation table of *keb* BGC (including tandem mass).

### **Supplementary Data 8:**

Protein sequence and accession ID of the BGC in this study.
